# Supplementary material
Source: HighWire-hosted journal article supplement (https://bmjopen.bmj.com/content/9/9/e030727)
Supplement: inline-supplementary-material-1 [file inline-supplementary-material-1.pdf]

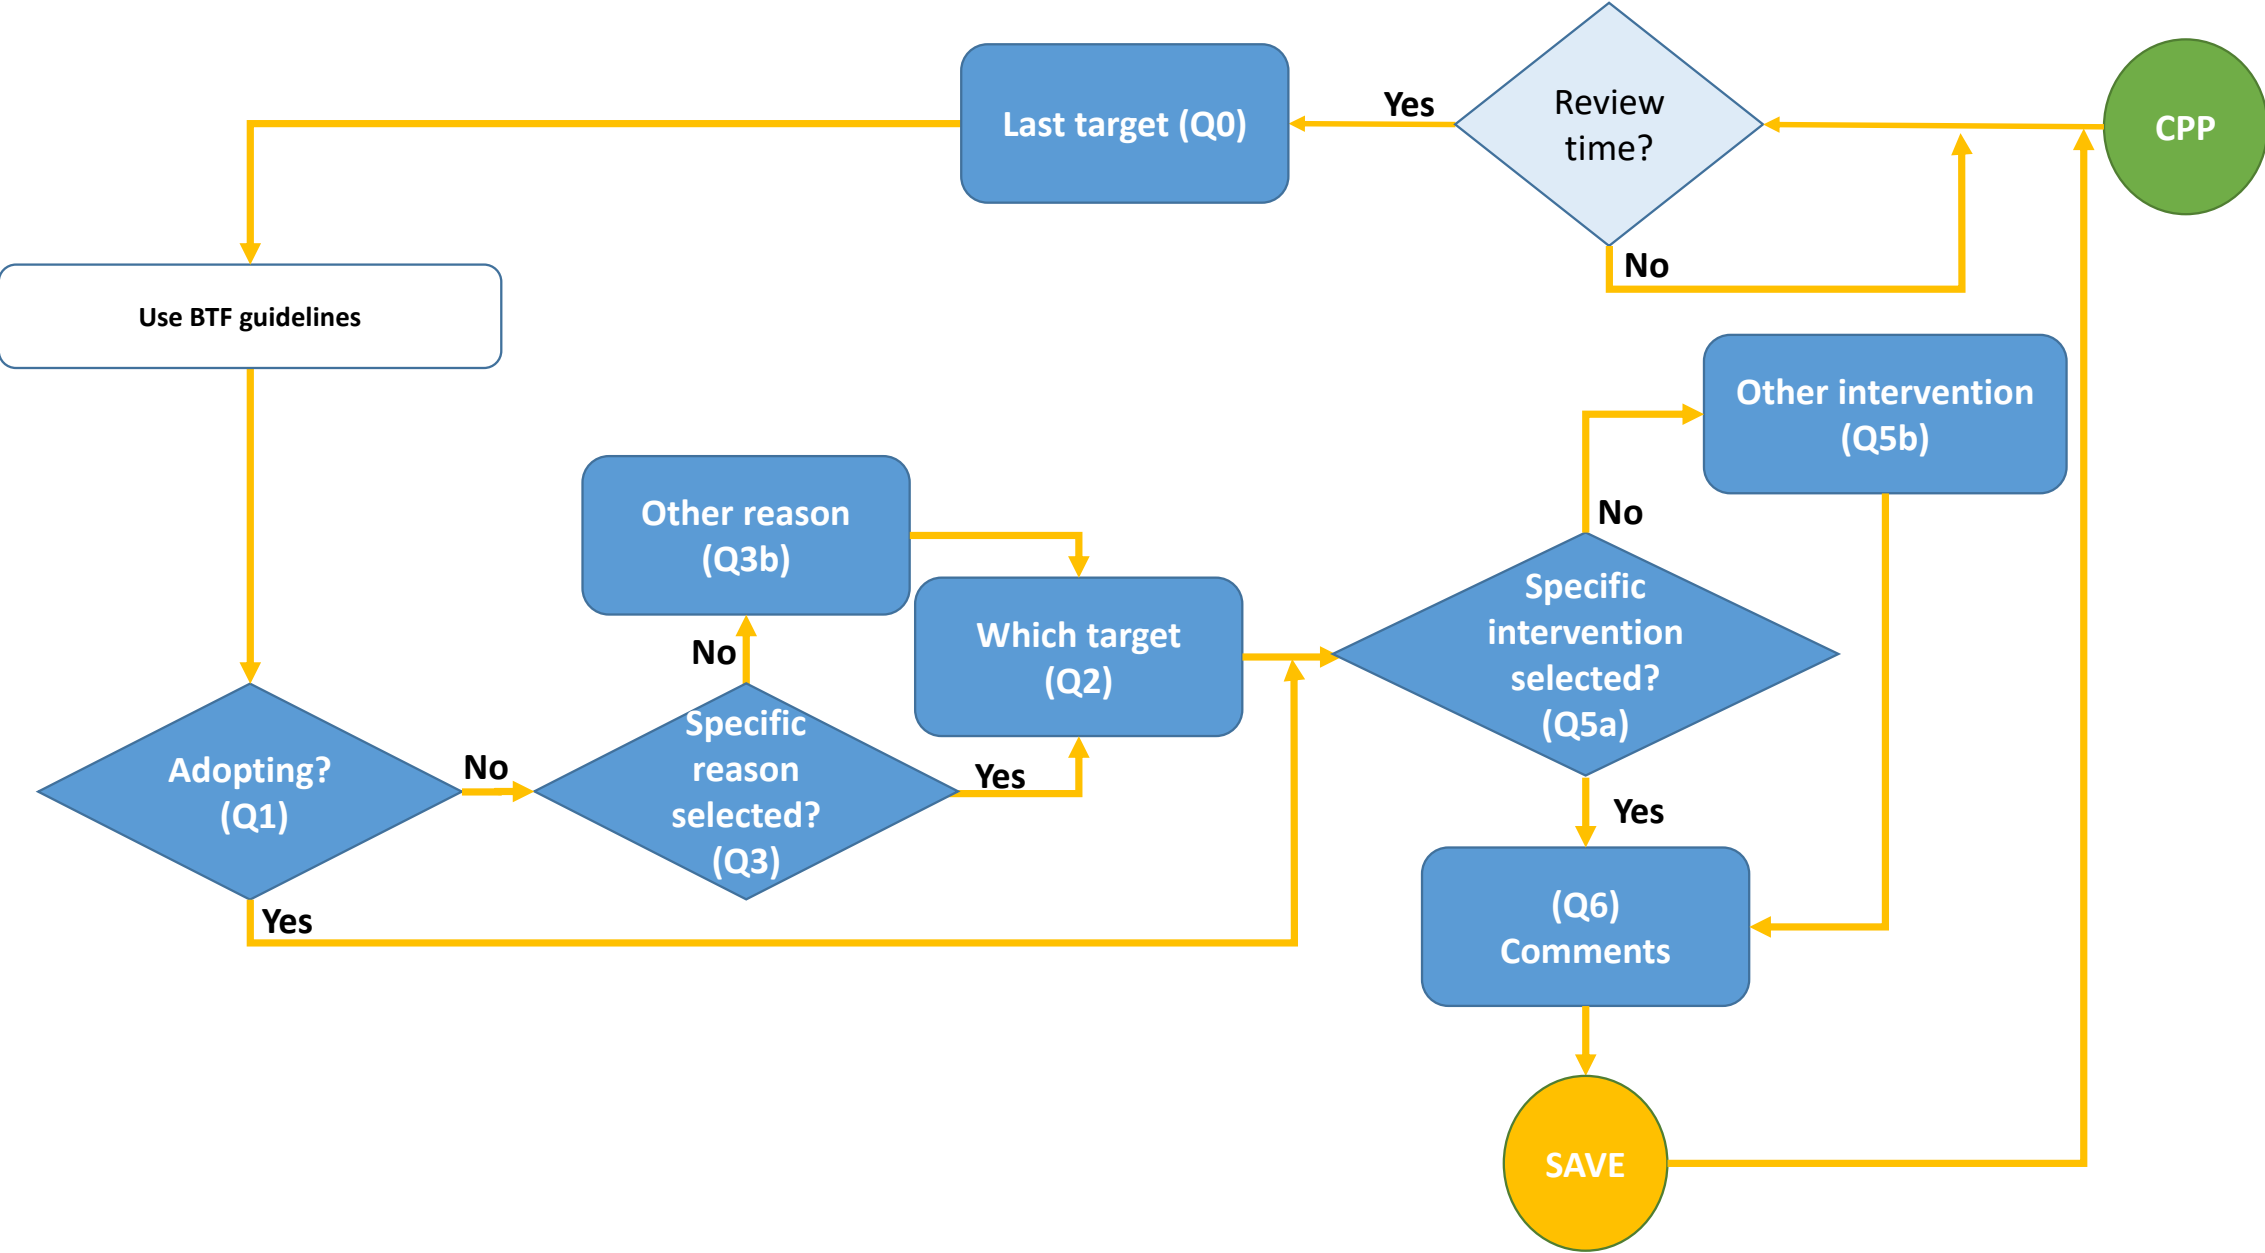

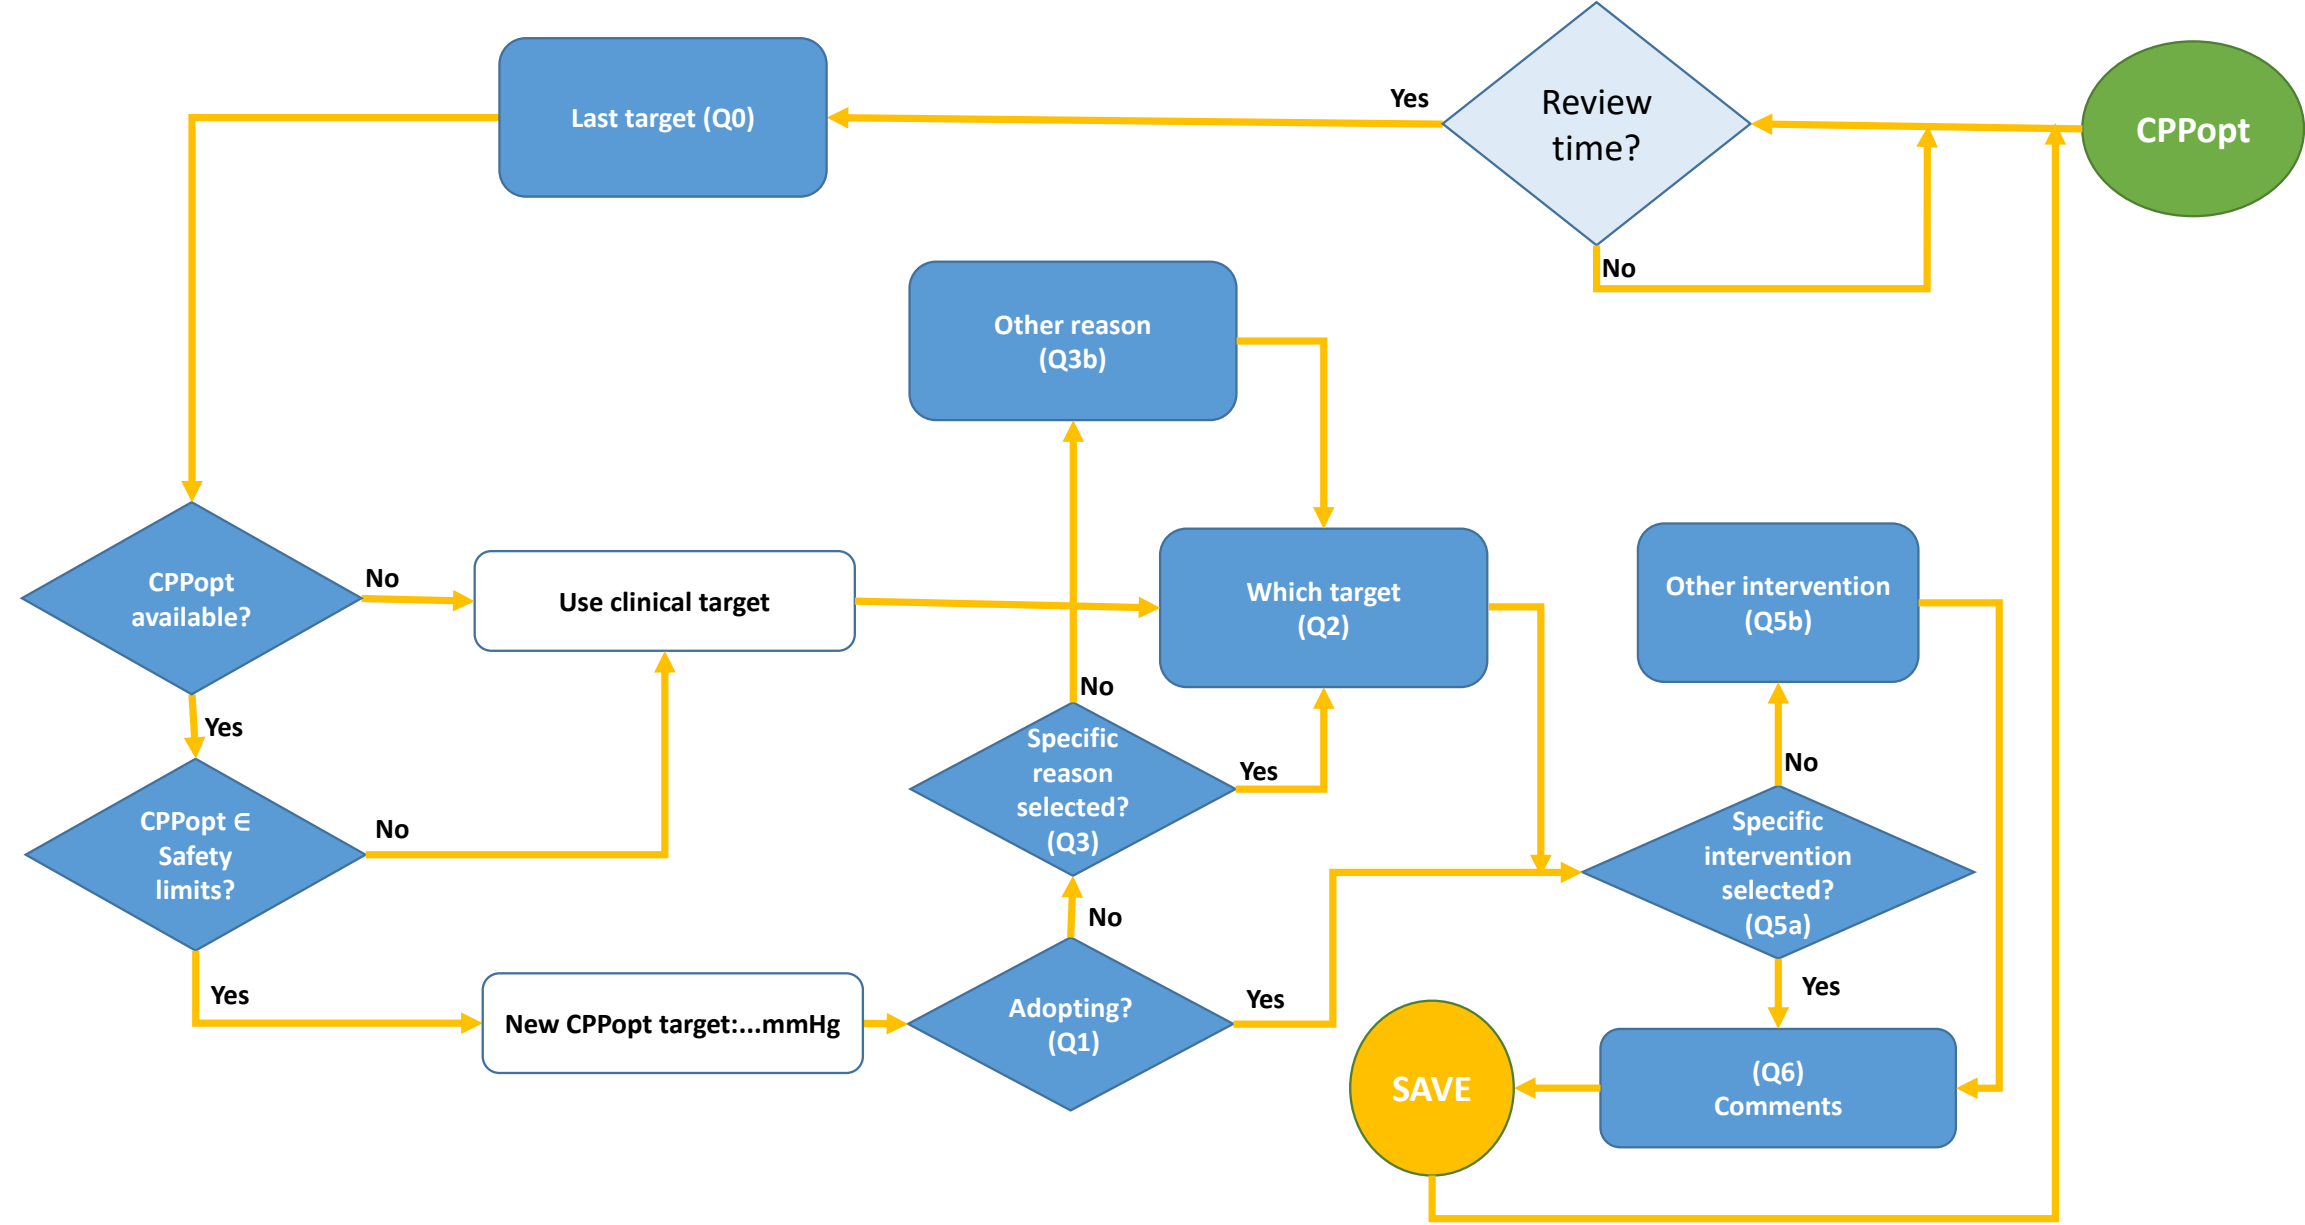

| Question number | Question in long version                                        | Question in short version | Answers in long version                                                                                                                                                                                                                                                                                                                                                    | Answers in short version                                                                                                                    |
|-----------------|-----------------------------------------------------------------|---------------------------|----------------------------------------------------------------------------------------------------------------------------------------------------------------------------------------------------------------------------------------------------------------------------------------------------------------------------------------------------------------------------|---------------------------------------------------------------------------------------------------------------------------------------------|
| Q0              | Were there any clinical problems with adopting the last target? | Problems?                 | yes<br>no                                                                                                                                                                                                                                                                                                                                                                  | yes<br>no                                                                                                                                   |
| Q1-CPP          | Will you be adopting the advised CPP target?                    | Adopting?                 | yes<br>no                                                                                                                                                                                                                                                                                                                                                                  | yes<br>no                                                                                                                                   |
| Q1-CPPopt       | Will you be adopting the advised CPPopt target?                 | Adopting?                 | yes<br>no                                                                                                                                                                                                                                                                                                                                                                  | yes<br>no                                                                                                                                   |
| Q2              | Which CPP target will yo be adopting?                           | Target?                   |                                                                                                                                                                                                                                                                                                                                                                            |                                                                                                                                             |
| Q3a-CPP         | Why not adopting the advised target?                            | Reason?                   | CPP value is very close to the BTF guidelines<br>The problem is severe intracranial hypertension<br>Maximal dose of vasopressors/and or inotropes<br>Concerns about extracranial bleeding<br>Concerns about lung function<br>Concerns about myocardial function<br>Concerns about renal function<br>Other                                                                  | BTF<br>severe IH<br>vasoactives<br>extracranial bleeding<br>lung<br>myocardial<br>renal<br>Other                                            |
| Q3a- CPPopt     | Why not adopting the advised target?                            | Reason?                   | Current CPP is close to CPPopt<br>Cerebral autoregulation is working<br>Cerebral autoregulation is impaired<br>the problem is severe intracranial hypertension<br>Maximal dose of vasopressors/and or inotropes<br>Concerns about extracranial bleeding<br>Concerns about lung function<br>Concerns about myocardial function<br>Concerns about renal function<br>Other... | CPPopt<br>severe IH<br>autoregulating<br>not autoregulating<br>vasoactives<br>extracranial bleeding<br>lung<br>myocardial<br>renal<br>Other |
| Q3b             | Why not adopting the advised target?                            | Other reason              |                                                                                                                                                                                                                                                                                                                                                                            |                                                                                                                                             |
| Q5a             | Which interventions are you planning to achieve the target?     | Interventions             | Increase or decrease ABP<br>Decrease ICP<br>Both treating ABP and ICP<br>Other...<br>Not needed                                                                                                                                                                                                                                                                            | ABP<br>ICP<br>ABP/ICP<br>other<br>no                                                                                                        |
| Q5b             | Which interventions are you planning to achieve the target?     | Other interventions       |                                                                                                                                                                                                                                                                                                                                                                            |                                                                                                                                             |
| Q6              | Comments                                                        |                           |                                                                                                                                                                                                                                                                                                                                                                            |                                                                                                                                             |
